# Supplementary material for: Ag(i) complexes with alkylidene-bis(2-aminopyrimidines) as building units for discrete metallomacrocyclic frames. A structural and solution study
Source: Royal Society of Chemistry journal article supplement (doi:10.1039/b508260a), 2005-01-01
Supplement: b508260a5.pdf [file b508260a5.pdf]

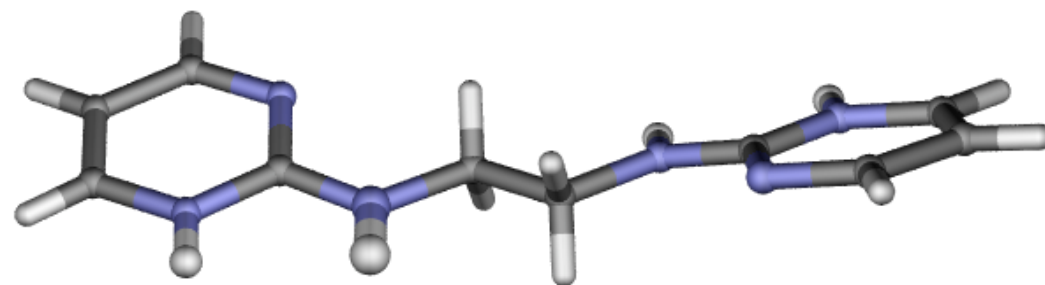

$[(\text{H-pyr})_2\text{C}_2](\text{NO}_3)_2$  **Ia**

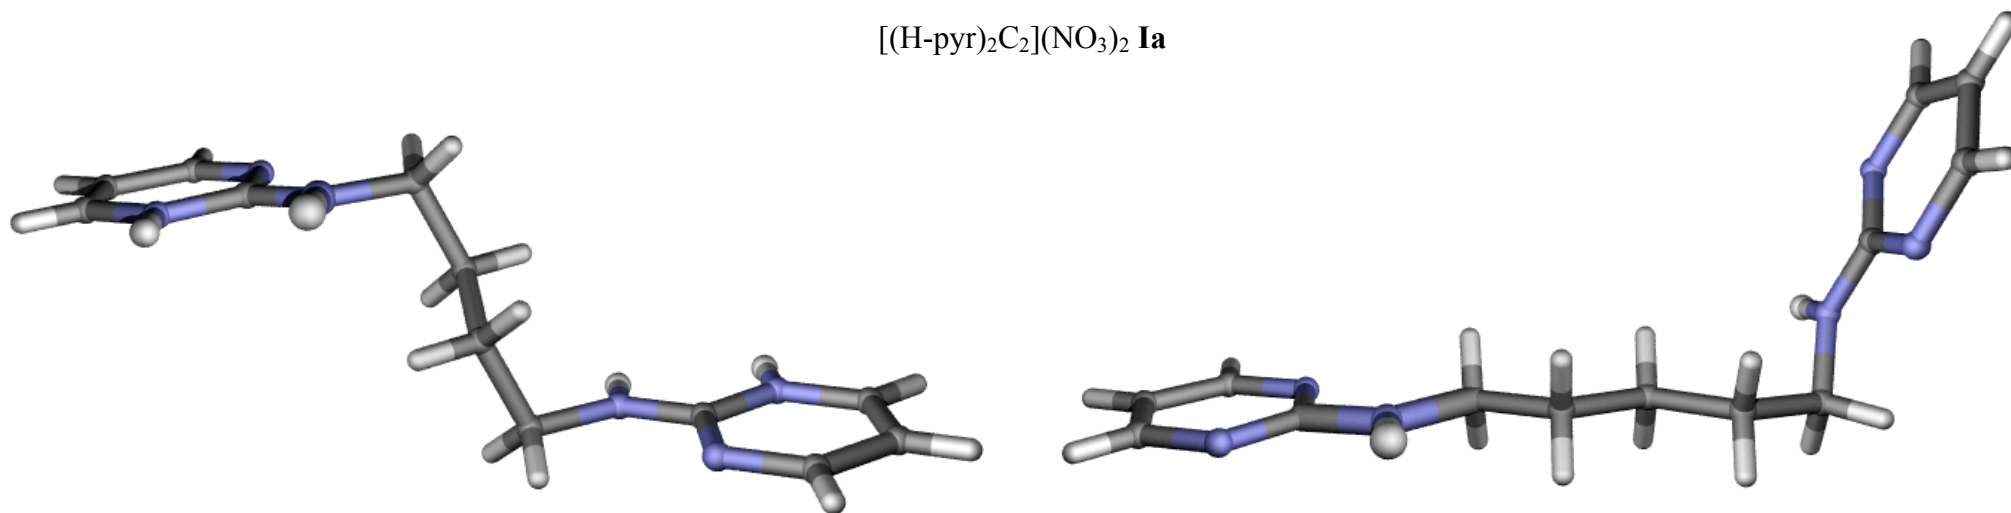

$[(\text{H-pyr})_2\text{C}_4](\text{NO}_3)_2$  **IIIa**

$\text{pyr}_2\text{C}_5$  **IV**

**Figure 4.** Effect of the linker length on the relative conformations of the two pyrimidine moieties in the three ligands.
