# Supplementary material for: Ag(i) complexes with alkylidene-bis(2-aminopyrimidines) as building units for discrete metallomacrocyclic frames. A structural and solution study
Source: Royal Society of Chemistry journal article supplement (doi:10.1039/b508260a), 2005-01-01
Supplement: b508260a7.pdf [file b508260a7.pdf]

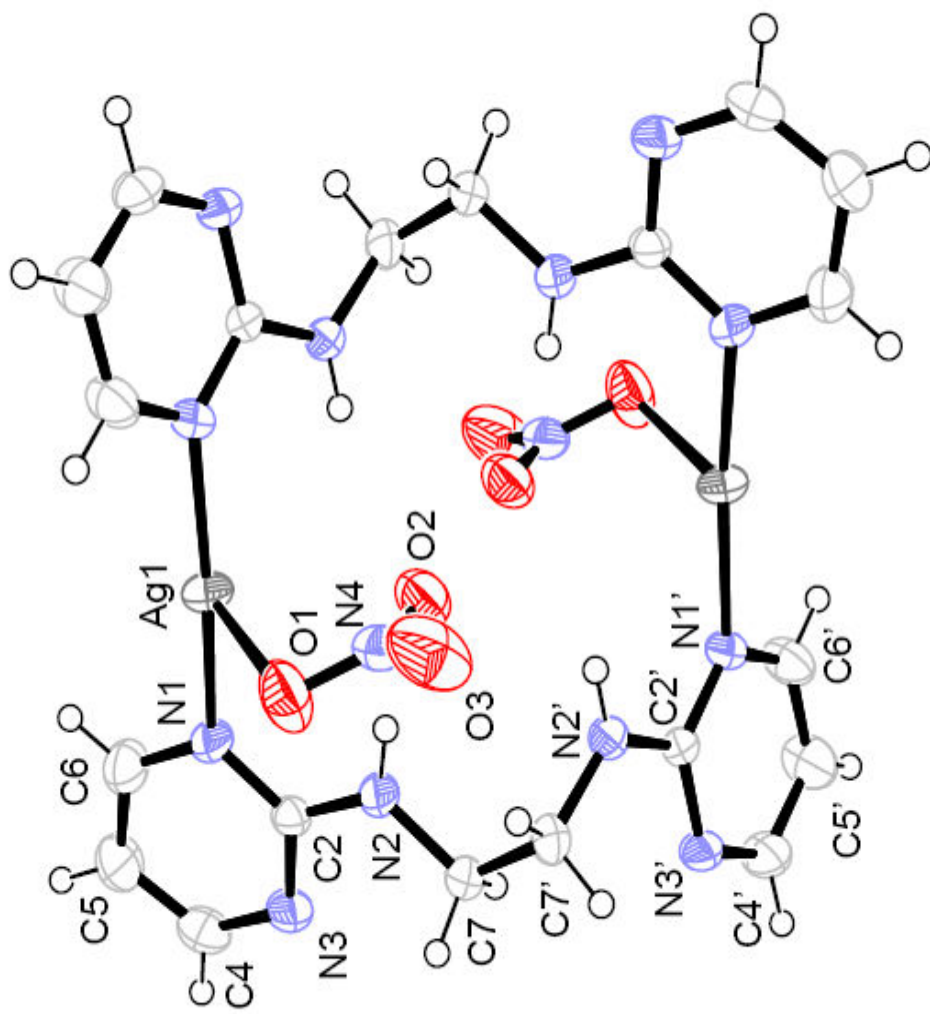

**Figure 6.** ORTEP of dimeric Ag(I) complex with pyrazole-2-carboxylic acid (L)  $[\text{AgL}(\text{NO}_3)]_2 \cdot \mathbf{1}$
