# Supplementary material for: Ag(i) complexes with alkylidene-bis(2-aminopyrimidines) as building units for discrete metallomacrocyclic frames. A structural and solution study
Source: Royal Society of Chemistry journal article supplement (doi:10.1039/b508260a), 2005-01-01
Supplement: b508260a9.pdf [file b508260a9.pdf]

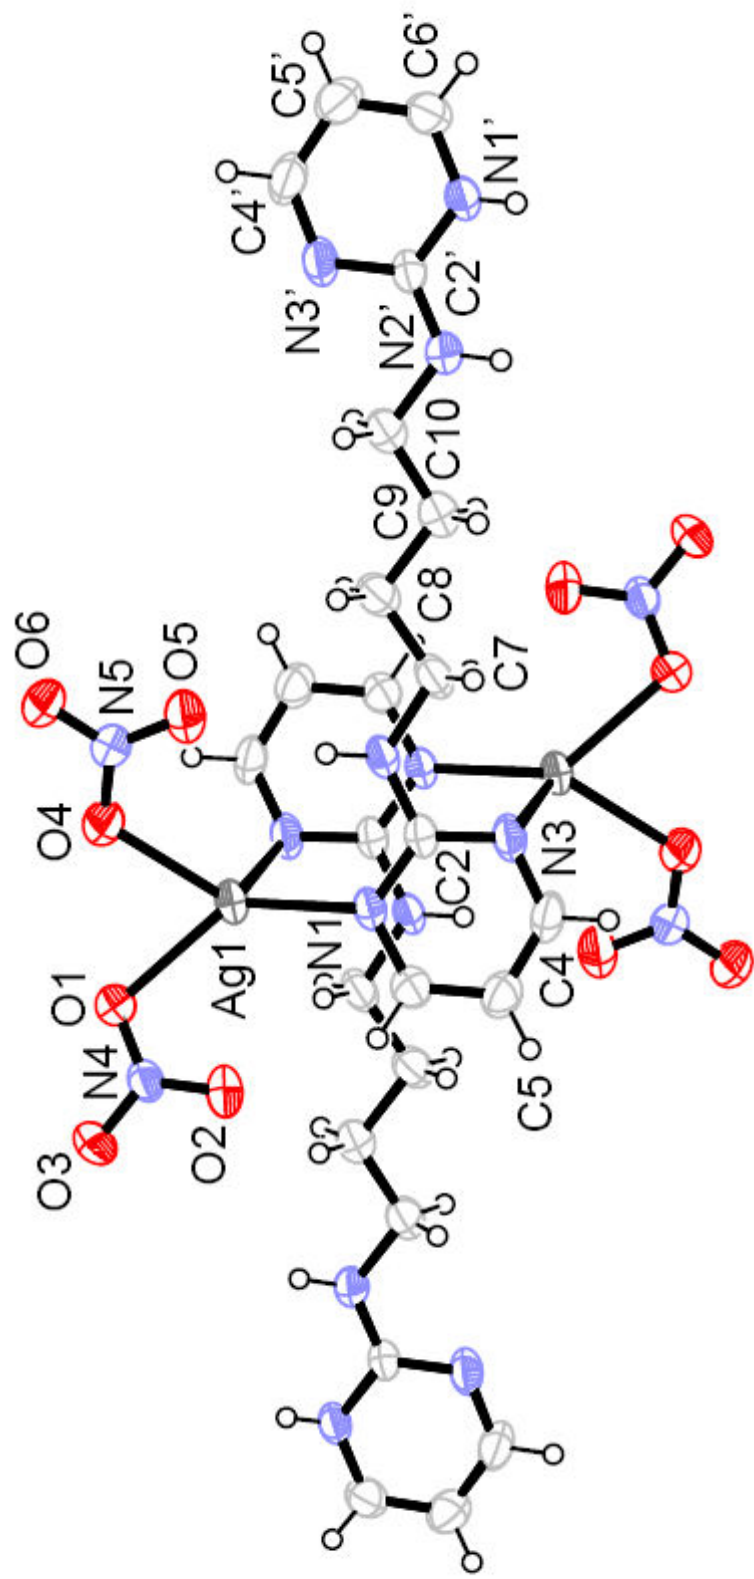

**Figure 8a.** ORTEP of dimeric Ag(I) complex with protonated  $\text{pyr}_2\text{C}_4$  (HL)  $[\text{Ag}(\text{HL})(\text{NO}_3)_2]_2$  **4**

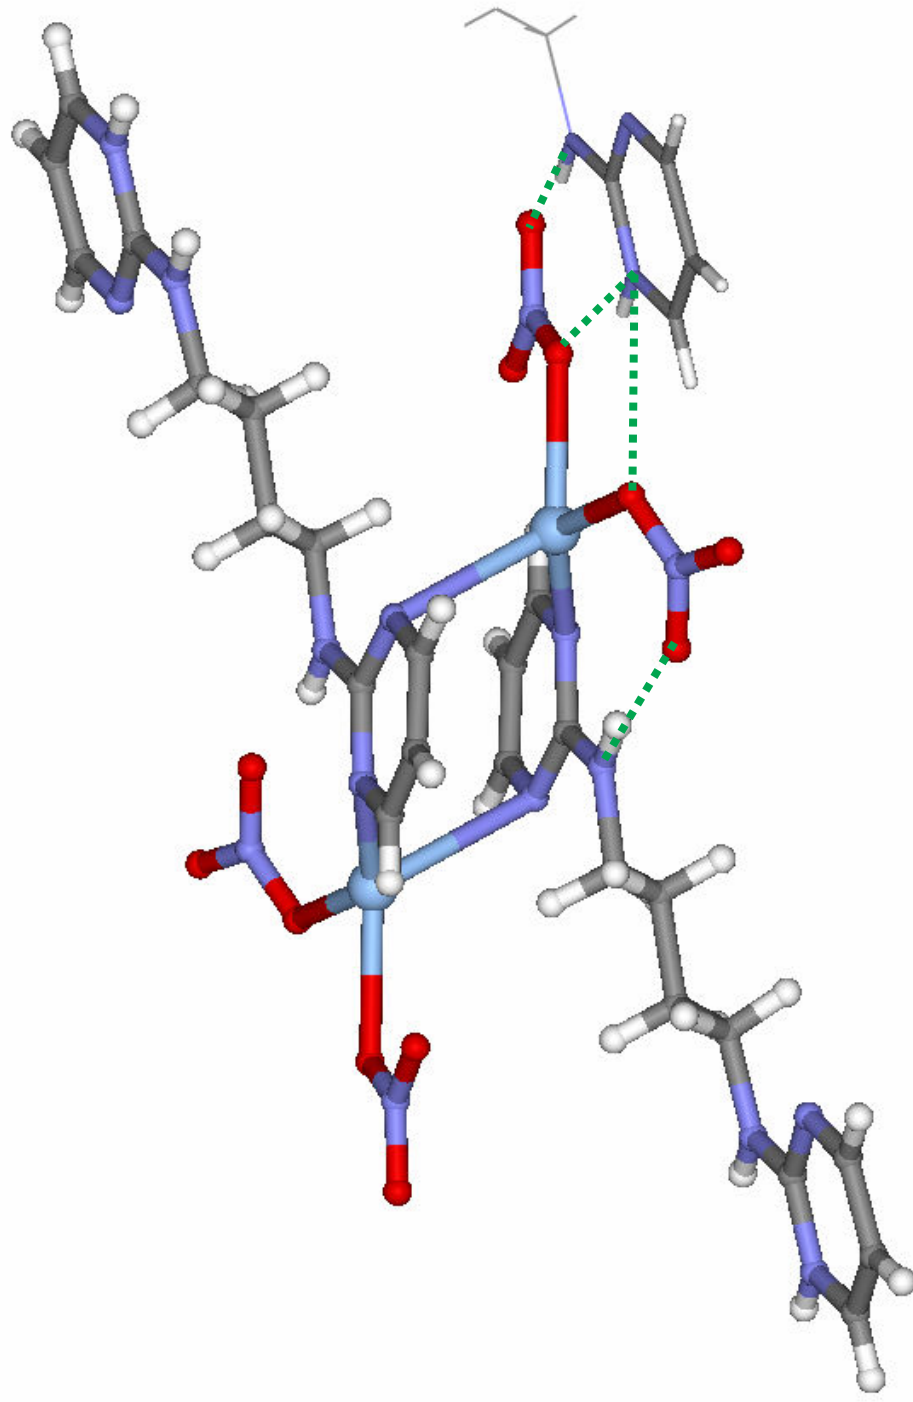

**Figure 8b.** B&S representation of the dimeric Ag(I)-protonated  $\text{pyr}_2\text{C}_4$  complex **4** showing the additional ligand-nitrate interactions
