# Supplementary figures and images for: Ag(i) complexes with alkylidene-bis(2-aminopyrimidines) as building units for discrete metallomacrocyclic frames. A structural and solution study
Source: Royal Society of Chemistry journal article supplement (doi:10.1039/b508260a), 2005-01-01

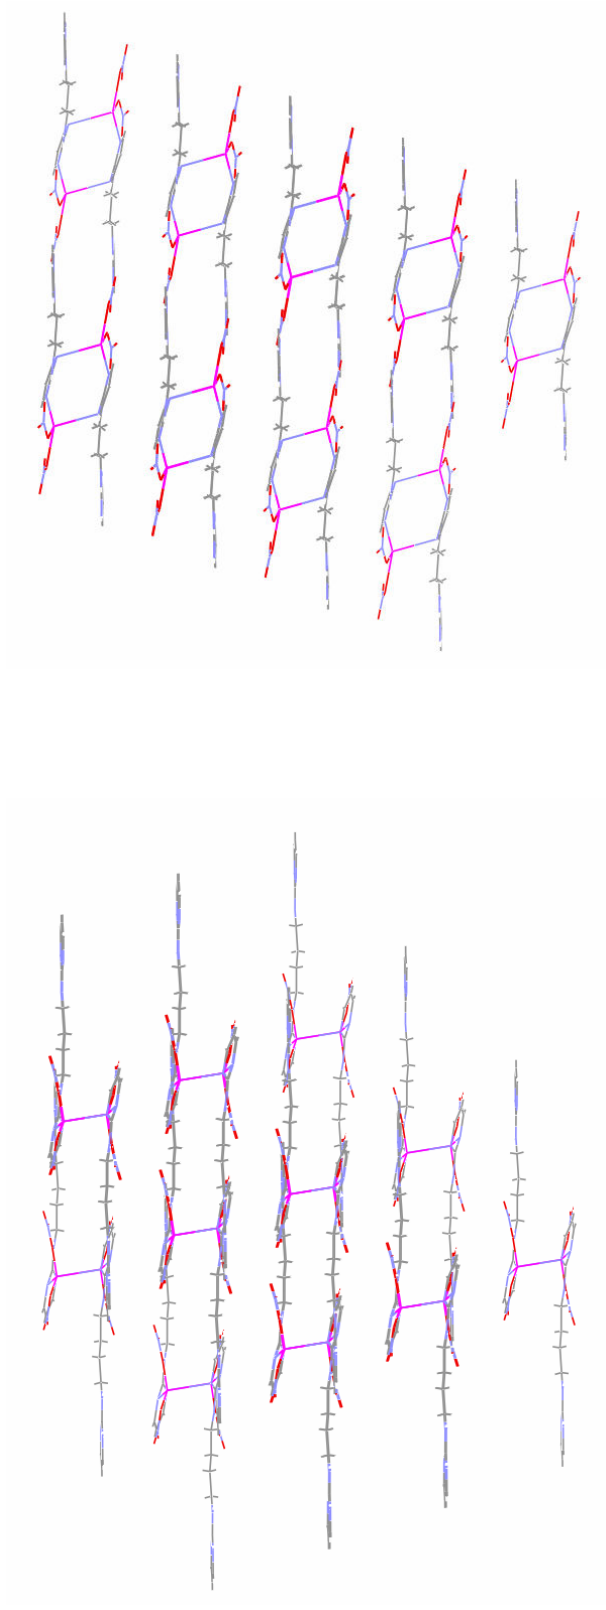

**Figure 9.** Two different views of crystal packing in  $[Ag(HL)(NO_3)_2]_2$  complex **4**

Supplement: b508260a10.pdf [file b508260a10.pdf]

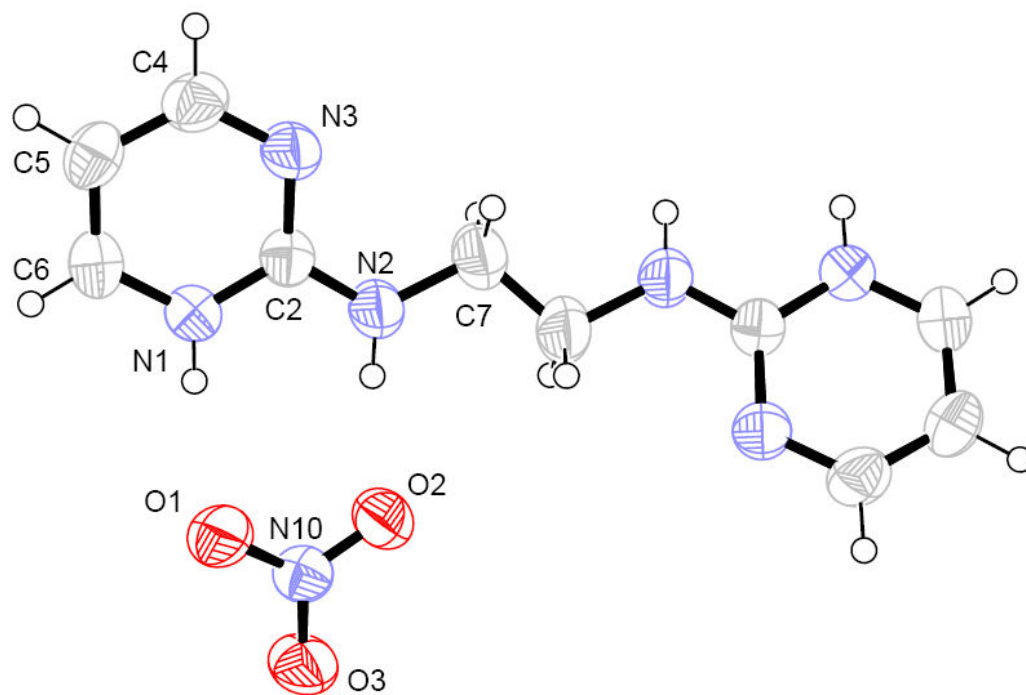

**Figure 1.** ORTEP of  $[(H-pyr)_2C_2](NO_3)_2$  **Ia**  
(second nitrate group has been omitted for clarity)

Supplement: b508260a2.pdf [file b508260a2.pdf]

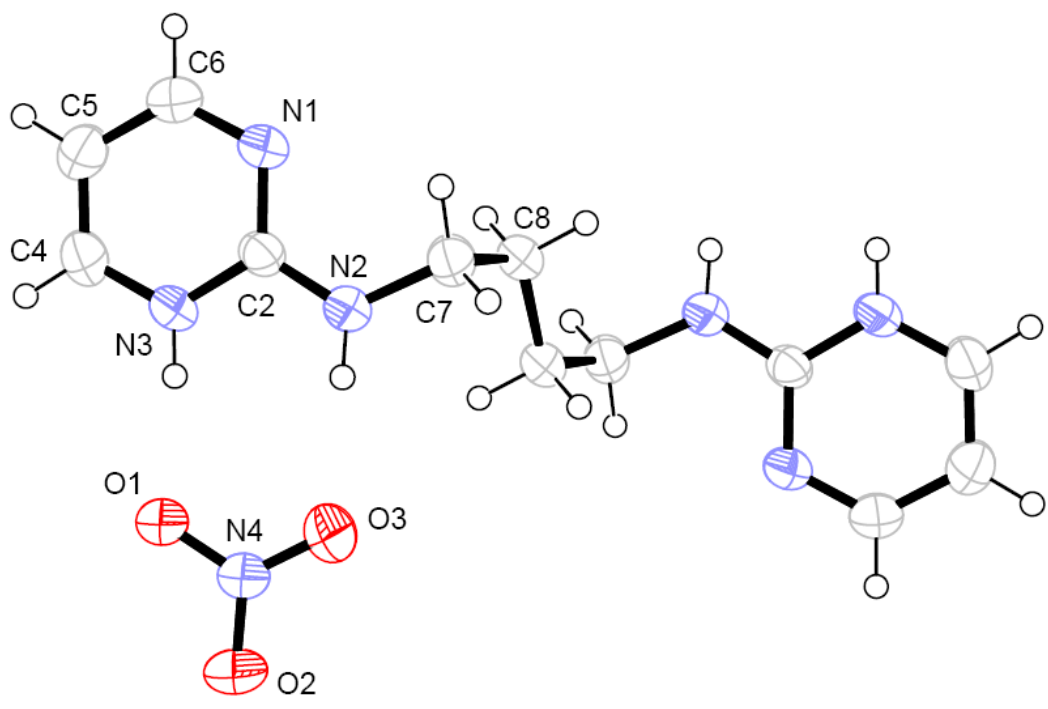

**Figure 2.** ORTEP of  $[(\text{H-pyr})_2\text{C}_4](\text{NO}_3)_2$  **IIIa**  
(second nitrate group has been omitted for clarity)

Supplement: b508260a3.pdf [file b508260a3.pdf]

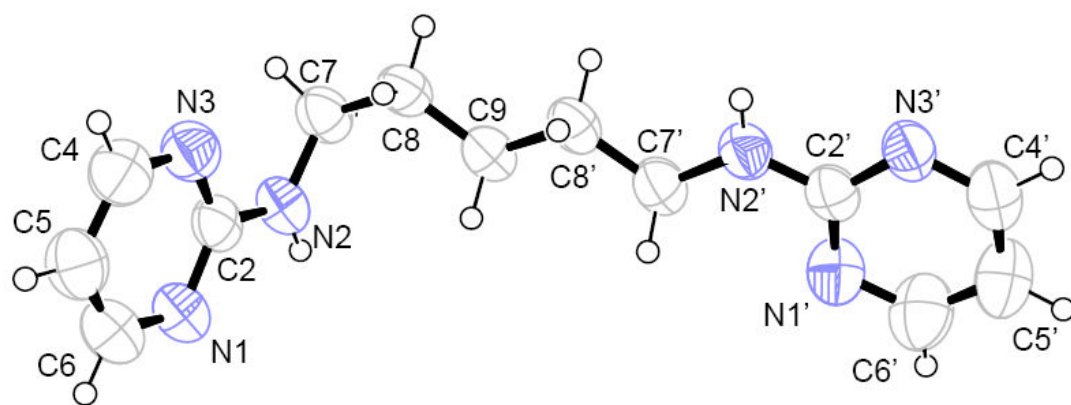

**Figure 3.** ORTEP of  $\text{pyr}_2\text{C}_5$  **IV**

Supplement: b508260a4.pdf [file b508260a4.pdf]

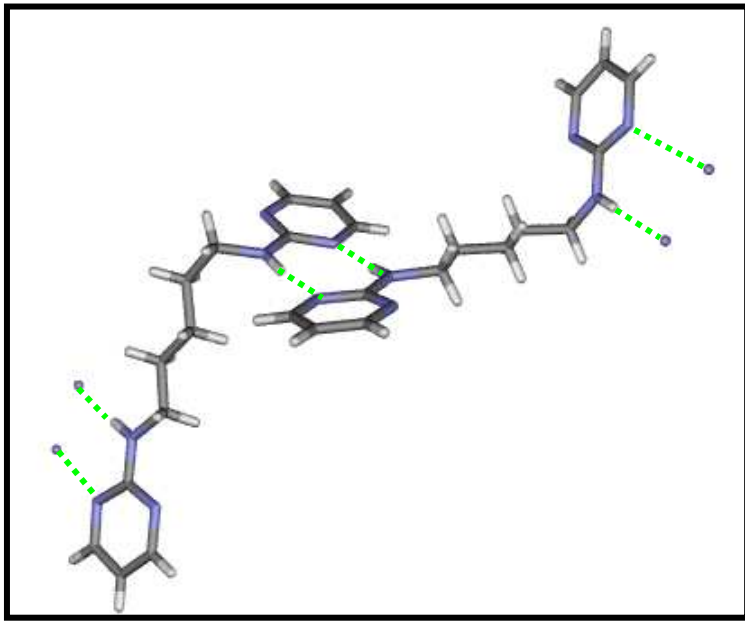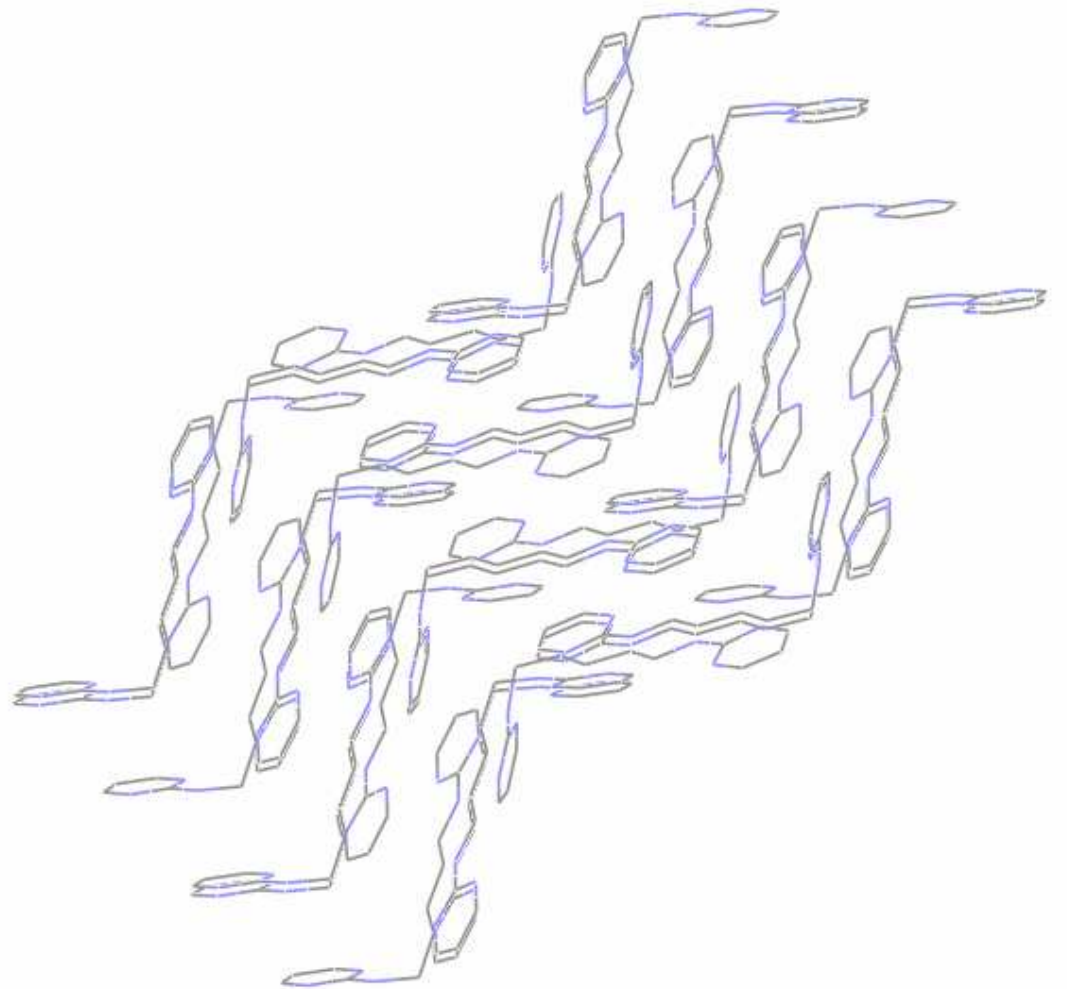

**Figure 5.** Crystal packing of pyr<sub>2</sub>C<sub>5</sub> **IV**

Supplement: b508260a6.pdf [file b508260a6.pdf]

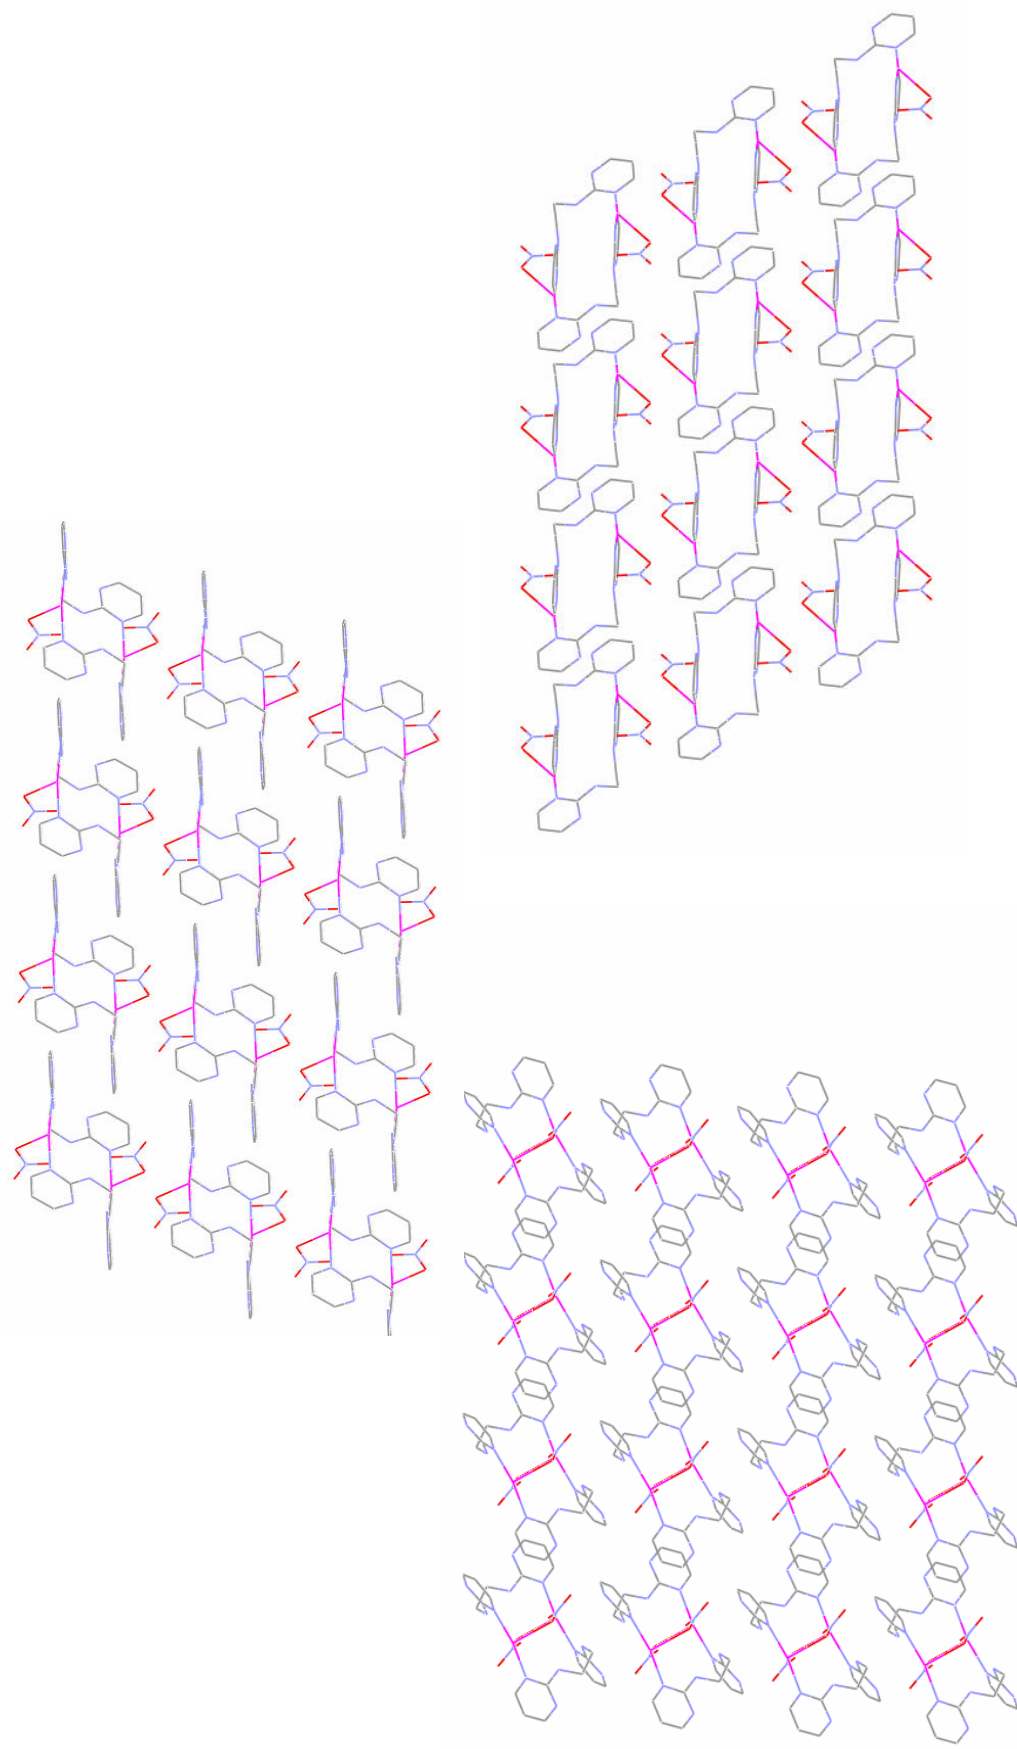

**Figure 7.** Crystal packing of Pyr<sub>2</sub>C<sub>2</sub>-Ag complex **1** (views along *a*, *b*, *c* axis, respectively)

Supplement: b508260a8.pdf [file b508260a8.pdf]
